# Supplementary material for: A small area model to assess temporal trends and sub-national disparities in healthcare quality
Source: PubMed Central journal article supplement (PMC10382513; doi:10.1038/s41467-023-40234-9), 2023-07-28
Supplement: 41467_2023_40234_MOESM1_ESM.pdf [file 41467_2023_40234_MOESM1_ESM.pdf]

1 **Supplementary information file to “A small area model to assess temporal trends**  
2 **and sub-national disparities in healthcare quality using facility surveys”**

3  
4 This supplementary file provides supplemental data, figures, and more detailed results for “A  
5 **small area model to assess temporal trends and sub-national disparities in healthcare**  
6 **quality using facility surveys”**  
7  
8

9 **Table of contents**

|    |                                                                                                       |    |
|----|-------------------------------------------------------------------------------------------------------|----|
| 10 | List of figures and tables.....                                                                       | 2  |
| 11 | Figures.....                                                                                          | 2  |
| 12 | Tables.....                                                                                           | 2  |
| 13 | Section 1. Supplementary Information.....                                                             | 3  |
| 14 | Section 1.1. Samples of the SDI and SPA surveys.....                                                  | 3  |
| 15 | Section 1.2. Geolocating health facilities.....                                                       | 4  |
| 16 | Section 1.3. Sampling of sick-child visits and vignettes.....                                         | 4  |
| 17 | Section 1.4 Differences between the SPA and SDI surveys.....                                          | 4  |
| 18 | Table S3. Covariate data sources.....                                                                 | 5  |
| 19 | Section 2. Supplementary Methods.....                                                                 | 5  |
| 20 | Section 2.1 List of tracer items and protocols included in the three countries, to estimate readiness |    |
| 21 | and process quality of care.....                                                                      | 5  |
| 22 | Section 2.2 Model for sub-national estimation of readiness and process quality of care metrics.....   | 7  |
| 23 | Section 2.3 Spatial random effects.....                                                               | 7  |
| 24 | Section 2.4 Accounting for the sampling design in Senegal.....                                        | 8  |
| 25 | Section 2.5 Model selection.....                                                                      | 8  |
| 26 | Section 3. Supplementary Results.....                                                                 | 9  |
| 27 | Section 3.1 Item availability by country.....                                                         | 9  |
| 28 | Section 3.2 Survey estimates of readiness and process quality of care metrics.....                    | 11 |
| 29 | Section 3.3 Model selection results.....                                                              | 12 |
| 30 | Section 3.4 Decomposition of the sources of variations in the readiness and process quality metrics   |    |
| 31 | .....                                                                                                 | 13 |
| 32 | Section 3.5 Comparison of subnational-level survey and model estimates for the readiness and          |    |
| 33 | process quality metrics in Kenya and Tanzania.....                                                    | 13 |
| 34 | Section 3.6 Examples of model outputs in Kenya and Tanzania.....                                      | 20 |
| 35 | Supplementary References.....                                                                         | 27 |

36  
37

38 **List of figures and tables**

39 **Figures**

40 Supplementary Figure S1: Comparison of county-level survey and model estimates for the  
41 readiness and process quality metrics in Kenya, in 2018.

42 Supplementary Figure S2: Comparison of region-level survey and model estimates for the  
43 readiness and process quality metrics in Tanzania, in 2016.

44 Supplementary Figure S3: Regression coefficients from small area model that included  
45 covariates, across indicators.

46 Supplementary Figure S4: Measures of (Panel A) calibration, and (Panel B) bias and precision  
47 of models' predictions for stratified analysis, using hold-out predictions of readiness and  
48 process quality metrics in departments of Senegal.

49 Supplementary Figure S5: Maps of model-estimated readiness (panel A) and process quality  
50 (panel B) metrics by subnational areas in Kenya in 2020, with associated uncertainty

51 Supplementary Figure S6: Maps of model-estimated readiness (panel A) and process quality  
52 (panel B) metrics by subnational areas in Tanzania in 2020, with associated uncertainty

53 Supplementary Figure S7: Maps of model-estimated readiness (top panel) and process quality  
54 (bottom panel) metrics by subnational areas, and managing authorities, in Kenya in 2020

55 Supplementary Figure S8: Maps of model-estimated readiness (top panel) and process quality  
56 (bottom panel) metrics by subnational areas, and managing authorities, in Tanzania in 2020

57 Supplementary Figure S9: Maps of model-estimated readiness (left panel) and process quality  
58 (right panel) metrics by subnational areas, and managing authorities, in Kenya in 2020.

59 **Tables**

60 Table S1. Characteristics of health facilities sampled in the SPA surveys, in Senegal, Kenya,  
61 and Tanzania

62 Table S2. Characteristics of health facilities sampled in the SDI surveys, in Senegal, Kenya,  
63 and Tanzania

64 Table S3. Covariate data sources

65 Table S4. List of items used to derive the readiness metric, and differences between the three  
66 countries

67 Table S5. List of diagnostic protocols used to derive the process quality metric

68 Table S6. Models considered to estimate readiness and process quality metrics over time and  
69 space

70 Table S7. Items availability in Kenya for each round of SPA/SDI survey

71 Table S8. Items availability in Senegal for each round of SPA survey

72 Table S9. Items availability in Tanzania for each round of SPA/SDI survey

73 Table S10: Survey estimates of the national average and the range across subnational areas  
74 of the readiness and process quality metrics in Kenya, Senegal, and Tanzania

75 Table S11: Models' fit assessed using WAIC, DIC, and LCPO

76 Table S12. Selected models and variance decomposition, for each readiness and process  
77 quality of care metrics in each country.  $\sigma_{S_i}^2$ ,  $\sigma_{\gamma_t}^2$ ,  $\sigma_{\alpha_t}^2$ ,  $\sigma_{\delta_{it}}^2$ ,  $\sigma_{v_t}^2$ , and  $X_{it}\beta$  columns indicate the  
78 percentage of total variance explained by each component.

79

80 **Section 1. Supplementary Information**

81 **Section 1.1. Samples of the SDI and SPA surveys**

82 In Senegal, data were collected as part of a Continuous SPA, which achieved a census of all  
 83 facilities after five rounds of surveys. Half of the hospitals and health centers were selected in  
 84 the first (2012-13) and third round (2015) of SPA, while the other half were selected in the  
 85 second (2014) and fourth round (2016), which created a dependent sampling structure  
 86 between the first four rounds of the continuous SPA. Random samples of facilities were  
 87 selected for the SPA conducted in 2017, 2018 and 2019. As the higher levels in the process  
 88 quality metrics, observed in years 2015 and 2016 compared to 2012-13 and 2014, were not  
 89 found in the later years, we can hypothesize that the facilities and providers who were  
 90 observed for the second time in 2015 and 2016, had a better knowledge of SPA interviewers'  
 91 assessment criteria, which could have led to an enhanced Hawthorne effect.  
 92

93

|                           | Kenya       |             |          | Tanzania |             |
|---------------------------|-------------|-------------|----------|----------|-------------|
|                           | SPA 1999    | SPA 2004    | SPA 2010 | SPA 2006 | SPA 2014-15 |
| <b>Facility type</b>      |             |             |          |          |             |
| Hospital                  | 32          | 172         | 253      | 128      | 263         |
| Health center             | 90          | 51          | 101      | 41       | 380         |
| Clinic                    | 256         | 217         | 349      | 437      | 557         |
| <b>Managing authority</b> |             |             |          |          |             |
| Public                    | 177         | 175         | 351      | 425      | 783         |
| Private                   | 211         | 265         | 352      | 186      | 417         |
| <b>Total</b>              | 388         | 440         | 703      | 611      | 1200        |
|                           | Senegal     |             |          |          |             |
|                           | SPA 2013/14 | SPA 2015/16 | SPA 2017 | SPA 2018 | SPA 2019    |
| <b>Facility type</b>      |             |             |          |          |             |
| Hospital                  | 70          | 73          | 35       | 29       | 31          |
| Health center             | 126         | 126         | 74       | 62       | 64          |
| Clinic                    | 531         | 557         | 287      | 248      | 246         |
| <b>Managing authority</b> |             |             |          |          |             |
| Public                    | 598         | 587         | 315      | 270      | 288         |
| Private                   | 129         | 159         | 81       | 69       | 73          |
| <b>Total</b>              | 727         | 746         | 396      | 339      | 361         |

94

95 **Table S1: Characteristics of health facilities sampled in the SPA surveys, in Senegal,**  
 96 **Kenya, and Tanzania**

97  
98  
99  
100  
101

| Facility type             | Tanzania     |          |          | Kenya    |          | Senegal  |
|---------------------------|--------------|----------|----------|----------|----------|----------|
|                           | SDI 2010     | SDI 2014 | SDI 2016 | SDI 2012 | SDI 2018 | SDI 2010 |
| Hospital                  | Not reported | 27       | 30       | 51       | 161      | 0        |
| Health center             | Not reported | 84       | 92       | 62       | 484      | 111      |
| Clinic                    | Not reported | 272      | 264      | 100      | 2,449    | 41       |
| <b>Managing authority</b> |              |          |          |          |          |          |
| Public                    | 175          | 269      | 273      | 158      | 1,781    | 151      |
| Private                   | 0            | 134      | 127      | 134      | 1,313    | 0        |
| <b>Total</b>              | 175          | 383      | 386      | 292      | 3,094    | 151      |

102  
103  
104  
105

**Table S2: Characteristics of health facilities sampled in the SDI surveys, in Senegal, Kenya, and Tanzania**

106 **Section 1.2. Geolocating health facilities**

107 For SPA survey data, we determined in which regions each facility was located using the GPS  
108 coordinates provided by the DHS program and the second-level administrative shapefiles that  
109 are publicly available from the Database of Global Administrative Areas (<https://gadm.org/>).  
110 The two most recent SPA surveys in Senegal did not collect GPS coordinates, but DHS  
111 provided a linkage file to assign a department to each sampled facility. SDI surveys include the  
112 administrative units as a variable directly.

113 **Section 1.3. Sampling of sick-child visits and vignettes**

114 In the SPA, the survey teams randomly selected three providers of curative care of sick  
115 children among all providers in this service present at the facility the day of the assessment. A  
116 maximum of five client consultations for each selected provider was observed. The client  
117 weights use the facility sampling weight as its base weight and take into account the total  
118 number of clients listed and interviewed within each of the sampling stratum, to calculate the  
119 probability of a given consultation to be observed. In the SDI, vignettes were administered to a  
120 random sample of health providers (doctors, medical assistants, nurses) among all eligible  
121 providers present at the facility the day of the assessment. Providers were randomly sampled  
122 among all eligible providers at the facility. The weights here simply represent the percentage  
123 probability of selection of a provider within each facility.

124 **Section 1.4 Differences between the SPA and SDI surveys**

125 The SPA and SDI surveys' inventory questionnaire mostly collect the same information, as  
126 both surveys use WHO's SARA framework to assess the availability and readiness of key  
127 infrastructure and services in facilities, what we referred to as readiness in this study.



128 However, the differences in the methodology used to assess providers' knowledge and  
 129 competence, referred to as process quality in this article, differs significantly. In the SPA  
 130 survey, interviewers directly observe patient-provider consultations using an observation  
 131 protocol. In the SDI survey, interviewers act as patients and record providers' questions,  
 132 examinations, and recommendations to a hypothetical clinical case, known as vignette. Past  
 133 studies have shown that compliance to protocol checklists tend to be higher with vignettes than  
 134 with direct clinical observations. To account for these differences in the assessment of process  
 135 quality between the SPA and SDI surveys, we used survey-specific effects in our model.

136

| Covariate                                             | Spatial resolution  | Temporal resolution | Source                      |
|-------------------------------------------------------|---------------------|---------------------|-----------------------------|
| Total population under five years old                 | Pixel-level         | Annual              | WorldPop                    |
| Travel time to nearest settlement >50,000 inhabitants | Pixel-level         | Annual              | WorldPop                    |
| Travel time to nearest health facility                | Pixel-level         | Annual              | WorldPop                    |
| Health worker density                                 | Administrative unit | Census years        | Censuses (derived)          |
| Urbanicity                                            | Pixel-level         | 2015                | ESA and land cover          |
| Night-time lights                                     | Pixel-level         | Annual              | VIIRS and DMSP (harmonized) |
| Educational attainment                                | Pixel-level         | Annual              | IHME                        |
| Human development index                               | Pixel-level         | Annual              | IHME                        |
| Elevation                                             | Pixel-level         | Annual              | ArcGIS                      |

137 DMSP=Defense Meteorological Satellite Program; ESA=European Space Agency;  
 138 IHME=Institute for Health Metrics and Evaluation; VIIRS= Visible Infrared Imaging Radiometer  
 139 Suite

140 **Table S3. Covariate data sources**

141

142 **Section 2. Supplementary Methods**

143 **Section 2.1 List of tracer items and protocols included in the three countries, to estimate**  
 144 **readiness and process quality of care**

145

146

---

Included (X)

---

|                                    | Kenya | Senegal | Tanzania |
|------------------------------------|-------|---------|----------|
| <b>Readiness</b>                   |       |         |          |
| Electricity                        | X     | X       |          |
| Improved water                     | X     | X       |          |
| Privacy of examination room        |       | X       |          |
| Improved latrine for client use    | X     | X       |          |
| Communication equipment            | X     | X       | X        |
| Computer with email                | X     | X       | X        |
| Emergency transport                | X     | X       |          |
| Disposal of sharps                 | X     | X       | X        |
| Disposal of medical waste          | X     | X       | X        |
| Monthly administrative meetings    |       | X       |          |
| Quality assurance system           |       | X       |          |
| System to collect opinion          |       | X       |          |
| Supervision in the last six months |       | X       |          |
| Health workers always available    |       | X       |          |
| Guidelines for IMCI                | X     | X       | X        |
| Child scale                        | X     | X       | X        |
| Infant scale                       | X     | X       | X        |
| Thermometer                        | X     | X       | X        |
| Stethoscope                        | X     | X       | X        |
| Amoxicillin for children           | X     | X       | X        |
| ORS                                | X     | X       | X        |
| Co-trimoxazole for children        | X     | X       | X        |
| Paracetamol                        | X     | X       | X        |
| Malaria diagnostic capacity        | X     | X       | X        |
| Antimalarial medication            | X     | X       | X        |

**Table S4: List of tracer items and diagnostic protocols used to derive the readiness metric, and differences between the three countries**

| Protocols                      |                                                                                                                              |
|--------------------------------|------------------------------------------------------------------------------------------------------------------------------|
| <b>Process quality of care</b> |                                                                                                                              |
| History taking                 | Provider asked about cough or difficulty breathing, diarrhoea, fever, inability to drink anything, vomiting, and convulsions |

---

|                      |                                                                                                                                                                                                                              |
|----------------------|------------------------------------------------------------------------------------------------------------------------------------------------------------------------------------------------------------------------------|
| Physical examination | Provider took child's temperature, checked for pallor, looked in child's ear, counted respiration, checked skin turgor for dehydration, undressed child to examine, weighed the child, pressed both feet to check for oedema |
|----------------------|------------------------------------------------------------------------------------------------------------------------------------------------------------------------------------------------------------------------------|

---

150 **Table S5: List of diagnostic protocols used to derive the process quality metric**

151 **Section 2.2 Model for sub-national estimation of readiness and process quality of care metrics**

152 The two composite indices of readiness and process quality of care described in table 2 were  
 153 modelled separately using a small area estimation approach. Specifically, we adapted a  
 154 previously developed Bayesian framework, which models the direct survey estimates as a  
 155 function of covariates, and space and time components <sup>1</sup>. This Bayesian spatial model allows  
 156 to estimate time series of the true underlying values of the metrics by smoothing over time and  
 157 space the direct estimates obtained from multiple surveys, with potentially different designs  
 158 and associated uncertainty. Specifically, in the first stage, we calculate the Horvitz-Thompson  
 159 estimator of the metric in area *i*, year *t*, and survey *s*, by using the sampling weight *w*  
 160 associated to each facility *k*:

162 
$$p_{its}^{HT} = \frac{\sum_{k \in i} w_{k,its} y_{k,its}}{\sum_{k \in i} w_{k,its}}$$
 with variance  $V_i^*$  calculated using standard methods, such as  
 163 jackknife.

164  
 165 To increase the precision of the design-based estimates of the metric, and to predict the metric  
 166 in areas or years where no data was collected, we use a hierarchical spatial model inspired by  
 167 Fay and Herriot classic framework:

168 
$$\text{logit}(p_{its}^{HT}) \sim N(\theta_{its}, V_{its})$$

169  
 170 
$$\theta_{its} = \mathbf{X}_{it}\boldsymbol{\beta} + \gamma_t + \alpha_t + e_i + S_i + \delta_{it} + v_s$$

171  
 172 Where  $\mathbf{X}_{it}\boldsymbol{\beta}$  are area-level covariates for area *i* in year *t* (see Table S3),  $\gamma_t$  are temporal  
 173 random effects modeled as a first order random walk,  $S_i$  are spatially structured random effects  
 174 (see section 2.3),  $\delta_{it}$  is a space-time interaction,  $\alpha_t$ ,  $e_i$  and  $v_s$  are temporal, spatial and survey  
 175 zero-mean independent random effects.  
 176

177 **Section 2.3 Spatial random effects**

178 We model area-level random effects using an intrinsically conditional autoregressive model  
 179 known as the BYM2 model- an extension of the BYM model originally developed by Besag,  
 180 York, and Mollie<sup>2</sup>, which adds penalized priors<sup>3</sup>. The use of spatially structured random effects  
 181 reflects our assumption that these unobserved characteristics affecting the availability of  
 182 quality care are likely to be correlated in space. For instance, remote administrative units might  
 183 face challenges - in accessing steady drug supply chains for essential medicines and testing  
 184 materials, or in attracting qualified health workers - that are more like adjacent units than that  
 185 experienced in the capital city. Models 1-4 are alternative where area-level random effects are  
 186 assumed to be independent and identically distributed rather than spatially correlated.

187

188 **Section 2.4 Accounting for the sampling design in Senegal**

189 In Senegal, to account for the changing sampling methods (described in B.1.1), we adopted an  
190 analytical approach that includes random effects to account for the rounds of SPA that  
191 comprised repeated selection of facilities.

192 **Section 2.5 Model selection**

193 Direct estimates and design-based variance estimates were computed using the **survey**  
194 package in R version 4.0.1. We fit the Bayesian hierarchical models using the Integrated  
195 Nested Laplace Approximation <sup>4</sup> and the **R-INLA** package <sup>5</sup> version 22.12.16. We obtained a  
196 subset of all included covariates by checking for multi-collinearity using the variance inflation  
197 factor with a threshold of 5. For each indicator and country, we compared the 7 models  
198 presented in Table S4 consisting of different combinations of the covariates selected with the  
199 variance inflation factor (VIF) procedure<sup>6</sup>, and spatio-temporal random effects, using three  
200 selection procedures (the deviance information criteria<sup>7</sup>, the Watanabe-Akaike information  
201 criteria <sup>8</sup>, and the sum of log-conditional predictive ordinate <sup>9</sup>). In the absence of consensus on  
202 a single criterion, when different criteria pointed to different models, we used a majority rule.  
203

| Model | Formula                                                                                   |
|-------|-------------------------------------------------------------------------------------------|
| 1     | $\gamma_t + \alpha_t + e_i + \delta_{it}$                                                 |
| 2     | $\gamma_t + \alpha_t + e_i + \delta_{it} + v_s$                                           |
| 3     | $\mathbf{X}_{it}\boldsymbol{\beta} + \gamma_t + \alpha_t + e_i + \delta_{it}$             |
| 4     | $\mathbf{X}_{it}\boldsymbol{\beta} + \gamma_t + \alpha_t + \delta_{it} + e_i + v_s$       |
| 5     | $\gamma_t + \alpha_t + S_i + e_i + \delta_{it}$                                           |
| 6     | $\gamma_t + \alpha_t + S_i + \delta_{it} + e_i + v_s$                                     |
| 7     | $\mathbf{X}_{it}\boldsymbol{\beta} + \gamma_t + \alpha_t + S_i + e_i + \delta_{it} + v_s$ |

204 **Table S6: Models considered to estimate readiness and process quality metrics over**  
205 **time and space**  
206

207

208

209 **Section 3. Supplementary Results**

210

211 **Section 3.1 Item availability by country**

212

| Kenya                                     | 1999       | 2004       | 2010       | 2018       |
|-------------------------------------------|------------|------------|------------|------------|
| Electricity                               | 58%        | 47%        | 26%        | 56%        |
| Improved water                            | 80%        | 85%        | 83%        | 97%        |
| Privacy of examination room               | 78%        | 76%        | 83%        | 100%       |
| Improved latrine for client use           | 98%        | 97%        | 97%        | 100%       |
| Communication equipment                   | 63%        | 47%        | 82%        | 75%        |
| Computer/internet/email                   | ---        | 8%         | 14%        | 74%        |
| Emergency transport                       | 26%        | 20%        | 10%        | 75%        |
| Disposal of sharps                        | 47%        | 75%        | 64%        | 97%        |
| Disposal of medical waste                 | 47%        | 97%        | 88%        | ---        |
| Monthly administrative meeting            | 51%        | 61%        | 49%        | 30%        |
| Quality assurance                         | 30%        | 24%        | 23%        | 28%        |
| Systematic collection of clients' opinion | 47%        | 61%        | 59%        | 32%        |
| Supervision in last 6 Months              | 56%        | 87%        | 83%        | ---        |
| Health workers available at all time      | 63%        | 47%        | 37%        | 77%        |
| IMCI guidelines available                 | 61%        | 11%        | 34%        | 10%        |
| Child scale                               | 85%        | 60%        | 68%        | 58%        |
| Infant scale                              | 85%        | 73%        | 68%        | 52%        |
| Thermometer                               | 86%        | 81%        | 88%        | 94%        |
| Stethoscope                               | 100%       | 78%        | 83%        | 97%        |
| Amoxicillin                               | 65%        | 78%        | 60%        | 79%        |
| ORS                                       | 86%        | 88%        | 75%        | 80%        |
| Co-trimoxazole                            | 86%        | 90%        | 78%        | 85%        |
| Paracetamol                               | 80%        | 88%        | 69%        | 92%        |
| Malaria diagnostic tools                  | ---        | 50%        | 45%        | 53%        |
| Antimalarial medication                   | 37%        | 80%        | 94%        | 83%        |
| <b>Unweighted mean</b>                    | <b>66%</b> | <b>64%</b> | <b>63%</b> | <b>70%</b> |

213

214 **Table S7: Items availability in Kenya for each round of SPA/SDI survey.** The unweighted  
 215 mean differs from the readiness metric presented in Table 3, as items are grouped and  
 216 averaged by domains (infrastructure, facility management, drug availability) before being  
 217 aggregated as the final readiness metric.

218

| Senegal                                   | 2013/14    | 2015/16    | 2017       | 2018       | 2019       |
|-------------------------------------------|------------|------------|------------|------------|------------|
| Electricity                               | 54%        | 55%        | 61%        | 56%        | 74%        |
| Improved water                            | 92%        | 94%        | 94%        | 97%        | 97%        |
| Privacy of examination room               | 99%        | 97%        | 99%        | 100%       | 96%        |
| Improved latrine for client use           | 91%        | 94%        | 99%        | 100%       | 96%        |
| Communication equipment                   | 54%        | 45%        | 55%        | 75%        | 85%        |
| Computer/internet/email                   | 53%        | 42%        | 61%        | 74%        | 78%        |
| Emergency transport                       | 51%        | 57%        | 57%        | 75%        | 63%        |
| Disposal of sharps                        | 87%        | 96%        | 92%        | 97%        | 88%        |
| Disposal of medical waste                 | ---        | ---        | ---        | ---        | ---        |
| Monthly administrative meeting            | 29%        | 36%        | 43%        | 30%        | 49%        |
| Quality assurance                         | 4%         | 9%         | 31%        | 28%        | 28%        |
| Systematic collection of clients' opinion | 11%        | 14%        | 27%        | 32%        | 43%        |
| Supervision in last 6 Months              | ---        | ---        | ---        | ---        | ---        |
| Health workers available at all time      | 85%        | 85%        | 84%        | 77%        | 71%        |
| IMCI guidelines available                 | 46%        | 64%        | 75%        | 58%        | 65%        |
| Child scale                               | 73%        | 76%        | 52%        | 49%        | 52%        |
| Infant scale                              | 70%        | 83%        | 86%        | 75%        | 71%        |
| Thermometer                               | 98%        | 99%        | 98%        | 99%        | 95%        |
| Stethoscope                               | 99%        | 100%       | 98%        | 99%        | 97%        |
| Amoxicillin                               | 82%        | 81%        | 78%        | 70%        | 68%        |
| ORS                                       | 78%        | 74%        | 76%        | 68%        | 64%        |
| Co-trimoxazole                            | 71%        | 58%        | 17%        | 29%        | 30%        |
| Paracetamol                               | 90%        | 89%        | 88%        | 84%        | 75%        |
| Malaria diagnostic tools                  | 75%        | 90%        | 85%        | 82%        | 76%        |
| Antimalarial medication                   | 61%        | 47%        | 64%        | 59%        | 54%        |
| <b>Unweighted mean</b>                    | <b>71%</b> | <b>71%</b> | <b>73%</b> | <b>73%</b> | <b>72%</b> |

**Table S8: Items availability in Senegal for each round of SPA survey.** The unweighted mean differs from the readiness metric presented in Table 3, as items are grouped and averaged by domains (infrastructure, facility management, drug availability) before being aggregated as the final readiness metric.

219  
220  
221  
222  
223  
224

| <b>Tanzania</b>           | <b>2006</b> | <b>2014</b> | <b>2014-15</b> | <b>2016</b> |
|---------------------------|-------------|-------------|----------------|-------------|
| Communication equipment   | 45%         | 30%         | 51%            | 40%         |
| Computer/internet/email   | 4%          | 9%          | 12%            | 12%         |
| Disposal of sharps        | 83%         | 87%         | 34%            | 81%         |
| Disposal of medical waste | 97%         | 88%         | 36%            | 82%         |
| IMCI guidelines available | 34%         | 58%         | 54%            | 80%         |
| Child scale               | 76%         | 83%         | 79%            | 78%         |
| Infant scale              | 54%         | 64%         | 72%            | 82%         |
| Thermometer               | 87%         | 91%         | 85%            | 93%         |
| ORS                       | 84%         | 76%         | 85%            | 88%         |
| Co-trimoxazole            | 81%         | 77%         | 86%            | 74%         |
| Paracetamol               | 84%         | 76%         | 69%            | 74%         |
| Malaria diagnostic tools  | 41%         | 81%         | 43%            | 94%         |
| Antimalarial medication   | 99%         | 91%         | 94%            | 96%         |
| <b>Unweighted mean</b>    | <b>67%</b>  | <b>71%</b>  | <b>62%</b>     | <b>73%</b>  |

**Table S9: Items availability in Tanzania for each round of SPA/SDI survey.** The unweighted mean differs from the readiness metric presented in Table 3, as items are grouped and averaged by domains (infrastructure, facility management, drug availability) before being aggregated as the final readiness metric.

### Section 3.2 Survey estimates of readiness and process quality of care metrics

| <b>Country and survey year</b> | <b>Readiness</b>                     |                       | <b>Process quality</b>               |                       |
|--------------------------------|--------------------------------------|-----------------------|--------------------------------------|-----------------------|
|                                | <b>Mean survey estimate (95% CI)</b> | <b>Absolute range</b> | <b>Mean survey estimate (95% CI)</b> | <b>Absolute range</b> |
| <b>Kenya</b>                   |                                      |                       |                                      |                       |
| SPA 1999                       | 63.1 (61.7-64.5)                     | 56.9-73.9             | 30.7 (29.7-31.7)                     | 20.5-39.2             |
| SPA 2004                       | 65.6 (63.3-67.9)                     | 59.4-72.7             | 35.5 (34.2-36.8)                     | 23.3-74.0             |
| SPA 2010                       | 60.6 (59.2-62.0)                     | 36.4-92.0             | 44.3 (43.3-45.5)                     | 19.3-86.7             |
| SDI 2018                       | 65.1 (64.6-65.6)                     | 52.4-83.3             | 43.7 (42.7-44.7)                     | 26.9-73.5             |
| <b>Senegal</b>                 |                                      |                       |                                      |                       |
| SPA 2012-14                    | 65.1 (64.3-65.9)                     | 40.0-77.1             | 38.5 (37.8-39.2)                     | 15.4-59.3             |
| SPA 2015-16                    | 65.7 (64.5-66.9)                     | 37.1-82.9             | 43.1 (42.1-44.1)                     | 19.2-63.7             |
| SPA 2017                       | 66.9 (65.5-68.3)                     | 31.3-82.9             | 34.5 (33.5-35.5)                     | 19.5-54.4             |
| SPA 2018                       | 65.0 (59.6-70.4)                     | 22.9-85.7             | 36.3 (32.5-40.1)                     | 23.8-66.7             |
| SPA 2019                       | 64.6 (61.3-67.9)                     | 31.4-85.7             | 39.0 (37.0-41.0)                     | 7.7-67.2              |
| <b>Tanzania</b>                |                                      |                       |                                      |                       |
| SPA 2006                       | 54.4 (53.6-55.3)                     | 42.2-68.8             | 39.8 (38.9-40.7)                     | 10.4-50.3             |
| SPA 2014-15                    | 62.5 (61.4-63.6)                     | 48.8-75.8             | 35.3 (34.7-36.0)                     | 21.4-67.7             |
| SDI 2014                       | 73.0 (71.8-75.2)                     | 58.2-92.2             | 36.4 (34.6-38.2)                     | 25.5-54.1             |
| SDI 2016                       | 74.6 (72.6-76.6)                     | 58.7-93.7             | 39.9 (37.1-42.7)                     | 22.4-71.9             |

234 **Table S10: Survey estimates of the national average and the range across subnational**  
 235 **areas of the readiness and process quality metrics in Kenya, Senegal, and Tanzania.**  
 236 Estimates presented in this table are empirical survey estimates (as opposed to the modeled  
 237 estimates presented in what follows). They were calculated separately for each SPA and SDI  
 238 survey, using their respective survey weights and design variables. The absolute range for  
 239 each survey was derived by estimating readiness and process quality by county (Kenya),  
 240 department (Senegal), and region (Tanzania). Although these surveys were typically powered  
 241 to provide reliable estimates at a less granular resolution (province, region, and zone,  
 242 respectively), we present the absolute range to illustrate the width of subnational inequities  
 243 within each country.  
 244

245 **Section 3.3 Model selection results**  
 246

| Model           | Kenya             |               |              |                         |               |               |
|-----------------|-------------------|---------------|--------------|-------------------------|---------------|---------------|
|                 | Readiness of care |               |              | Process quality of care |               |               |
|                 | WAIC              | DIC           | LCPO         | WAIC                    | DIC           | LCPO          |
| 1               | -239.68           | 121.82        | 54.97        | -211.41                 | 170.79        | -91.44        |
| 2               | <b>-239.71</b>    | <b>121.84</b> | <b>55.02</b> | -211.47                 | 170.80        | -91.25        |
| 3               | -238.03           | 122.57        | 52.68        | -212.92                 | 170.36        | -89.43        |
| 4               | -237.88           | 122.69        | 52.74        | -212.79                 | 170.49        | -89.47        |
| 5               | -239.88           | 120.99        | 58.00        | -212.67                 | 169.89        | -84.13        |
| 6               | -239.92           | 120.95        | 58.00        | -212.58                 | 169.95        | -84.41        |
| 7               | -238.43           | 122.00        | <b>55.45</b> | <b>-214.31</b>          | <b>169.93</b> | <b>-82.43</b> |
| <b>Senegal</b>  |                   |               |              |                         |               |               |
| 1               | -66.73            | 157.56        | 76.48        | -147.75                 | 180.47        | 85.15         |
| 2               | -66.97            | 157.28        | 76.55        | -147.78                 | 180.33        | 85.07         |
| 3               | -67.84            | 158.78        | 76.66        | -147.29                 | 181.14        | 87.02         |
| 4               | -67.73            | 158.80        | 76.84        | -147.04                 | 181.20        | 87.04         |
| 5               | <b>-66.94</b>     | <b>157.34</b> | <b>75.61</b> | <b>-147.80</b>          | <b>180.64</b> | <b>85.49</b>  |
| 6               | -67.02            | 157.54        | 75.70        | -147.67                 | 180.61        | 85.56         |
| 7               | -67.79            | 158.87        | 76.61        | -147.23                 | 181.09        | 87.32         |
| <b>Tanzania</b> |                   |               |              |                         |               |               |
| 1               | <b>-33.59</b>     | <b>53.46</b>  | <b>25.71</b> | -71.01                  | 71.20         | 61.07         |
| 2               | -33.27            | 53.37         | 25.43        | -71.08                  | 71.10         | 61.26         |
| 3               | -31.90            | 53.54         | 25.57        | <b>-71.68</b>           | <b>71.42</b>  | <b>60.04</b>  |
| 4               | -31.90            | 53.54         | 25.57        | -71.68                  | 71.42         | 60.04         |
| 5               | -32.95            | 53.45         | 26.29        | -70.99                  | 71.22         | 61.58         |
| 6               | -33.15            | 53.26         | 26.12        | -70.94                  | 71.26         | 61.71         |
| 7               | -31.47            | 53.56         | 25.97        | -71.41                  | 71.50         | 61.13         |

247 **Table S11: Models' fit assessed using WAIC, DIC, and LCPO.** Lower WAIC and DIC  
 248 indicate better model performance, while higher LCPO indicates better model performance.  
 249  
 250



251  
252  
253  
254  
255  
256

**Section 3.4 Decomposition of the sources of variations in the readiness and process quality metrics**

| Senegal                 |                |                  |                  |                       |                       |                          |                  |               |
|-------------------------|----------------|------------------|------------------|-----------------------|-----------------------|--------------------------|------------------|---------------|
| Outcome                 | Model selected | $\sigma_{e_i}^2$ | $\sigma_{S_i}^2$ | $\sigma_{\gamma_t}^2$ | $\sigma_{\alpha_t}^2$ | $\sigma_{\delta_{it}}^2$ | $\sigma_{v_s}^2$ | $X_{it}\beta$ |
| Readiness of care       | 5              | ---              | 34.8             | 2.6                   | 1.4                   | 61.1                     | ---              | ---           |
| Process quality of care | 5              | ---              | 0.6              | 1.9                   | 2.2                   | 95.3                     | ---              | ---           |
| Kenya                   |                |                  |                  |                       |                       |                          |                  |               |
| Outcome                 | Model selected | $\sigma_{e_i}^2$ | $\sigma_{S_i}^2$ | $\sigma_{\gamma_t}^2$ | $\sigma_{\alpha_t}^2$ | $\sigma_{\delta_{it}}^2$ | $\sigma_{v_s}^2$ | $X_{it}\beta$ |
| Readiness of care       | 2              | 6.7              | ---              | 10.3                  | 24.6                  | 1.5                      | 56.9             | ---           |
| Process quality of care | 7              | ---              | 3.6              | 1.9                   | 3.5                   | 24.6                     | 7.7              | 58.8          |
| Tanzania                |                |                  |                  |                       |                       |                          |                  |               |
| Outcome                 | Model selected | $\sigma_{e_i}^2$ | $\sigma_{S_i}^2$ | $\sigma_{\gamma_t}^2$ | $\sigma_{\alpha_t}^2$ | $\sigma_{\delta_{it}}^2$ | $\sigma_{v_s}^2$ | $X_{it}\beta$ |
| Readiness of care       | 3              | 0.6              | ---              | 6.3                   | 57.3                  | 12                       | ---              | 23.8          |
| Process quality of care | 3              | 0.5              | ---              | 1.3                   | 0.8                   | 53.8                     | ---              | 43.5          |

257 **Table S12: Selected models and variance decomposition, for each readiness and**  
 258 **process quality of care metrics in each country. The  $\sigma_{e_i}^2, \sigma_{S_i}^2, \sigma_{\gamma_t}^2, \sigma_{\alpha_t}^2, \sigma_{\delta_{it}}^2, \sigma_{v_s}^2,$  and  $X_{it}\beta$**   
 259 **columns indicate the percentage of total variance explained by the zero-mean spatial**  
 260 **component, the spatially-structured component, the temporally-structured component,**  
 261 **the zero-mean temporal component, the space-time interaction component, and the**  
 262 **covariate component.**  
 263

264 **Section 3.5 Comparison of subnational-level survey and model estimates for the readiness and**  
 265 **process quality metrics in Kenya and Tanzania**  
 266

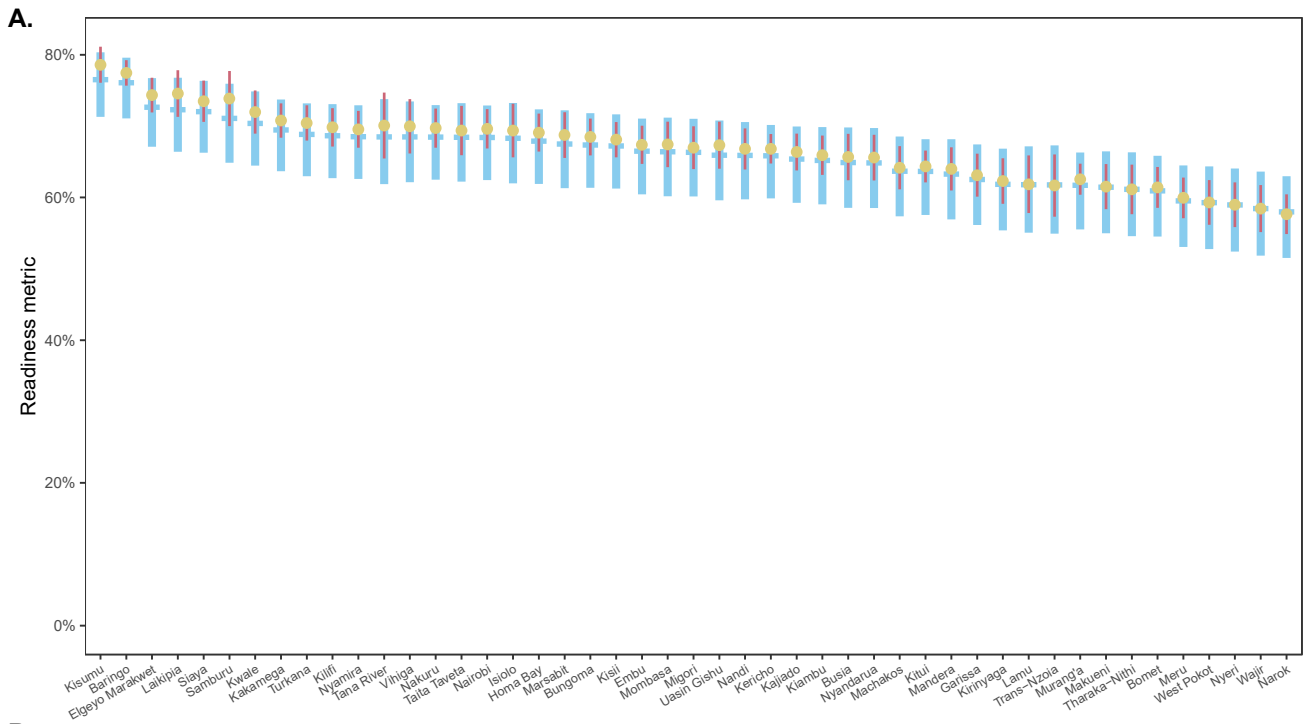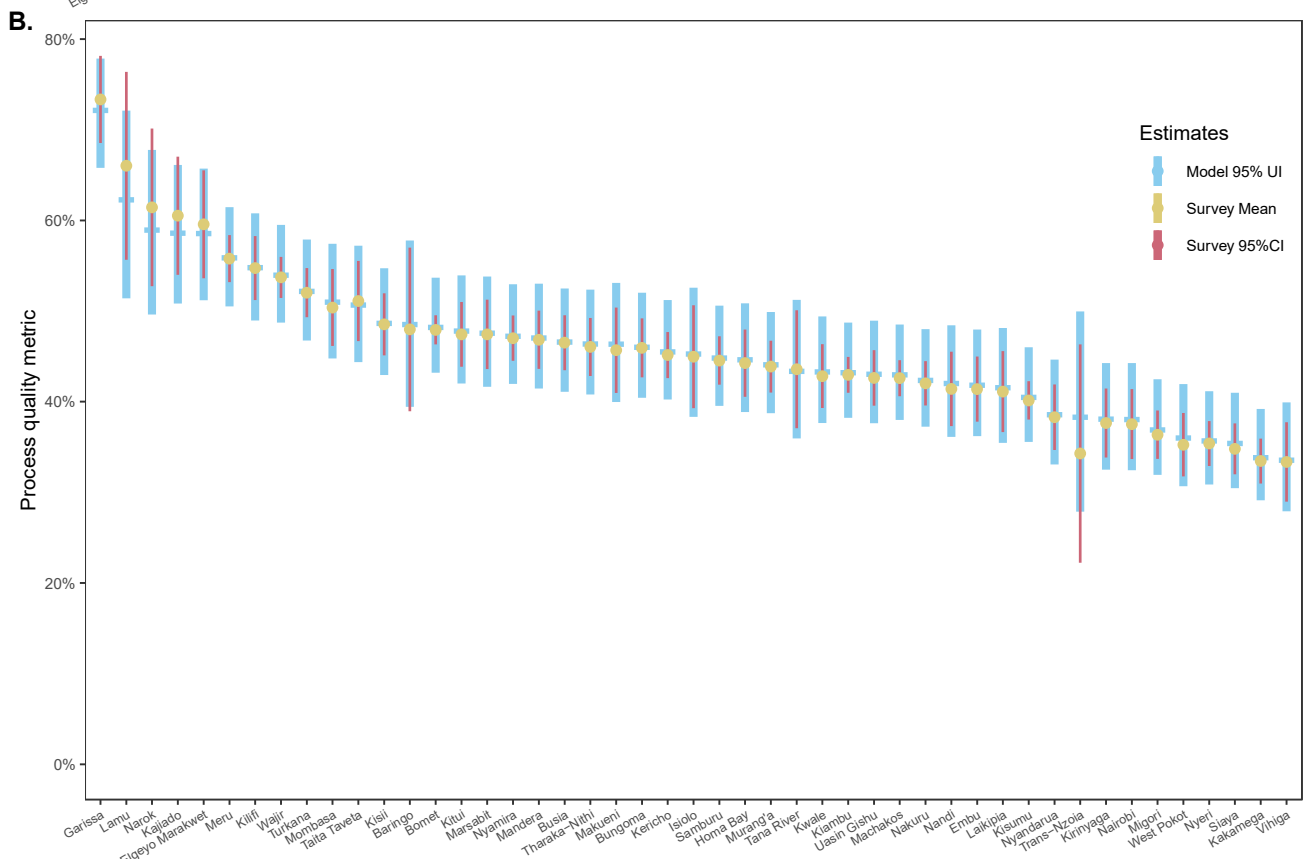

267  
268  
269

**Supplementary Figure S1: Comparison of county-level survey and model estimates for the readiness and process quality metrics in Kenya, in 2018.** This figure compares empirical

270 survey and model estimates, for the most recent year when data was available in Kenya. Thick light-blue  
271 dash and vertical ranges show model posterior mean estimates, and the 95% posterior prediction intervals.  
272 Yellow dots and narrow red vertical lines indicate survey estimates and 95% confidence intervals, derived  
273 from SDI 2018.  
274

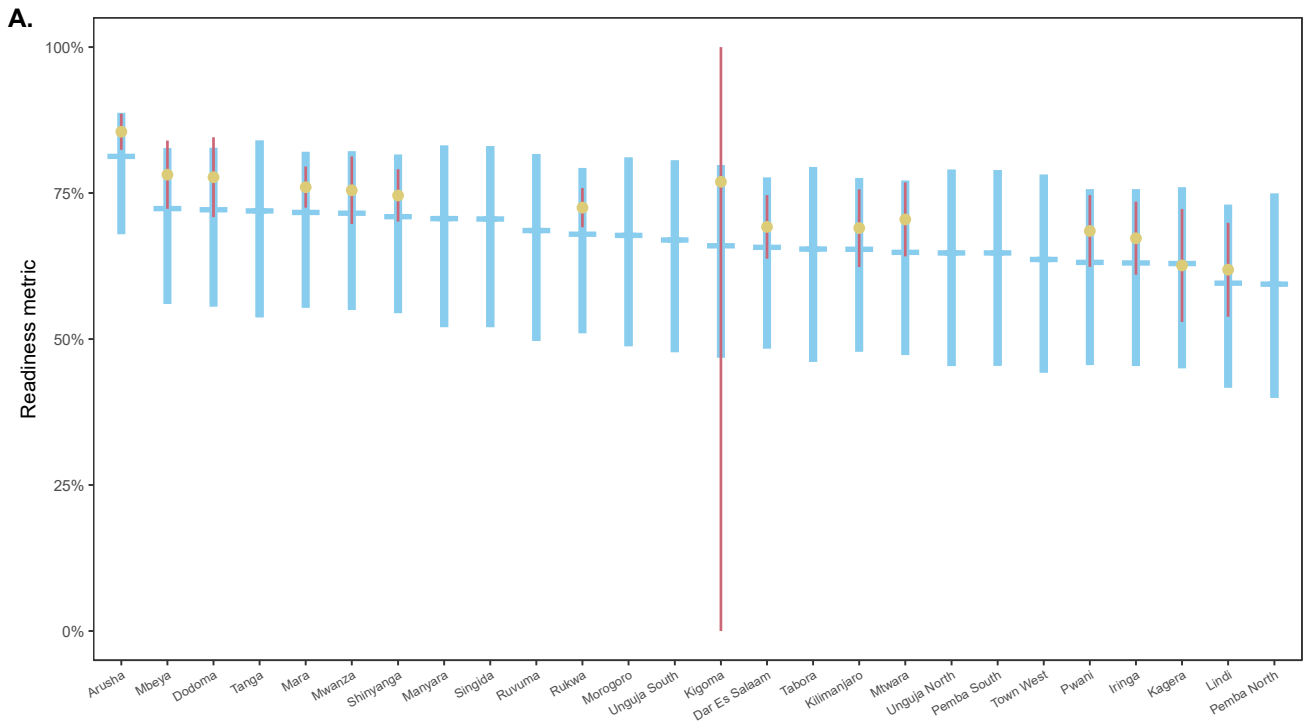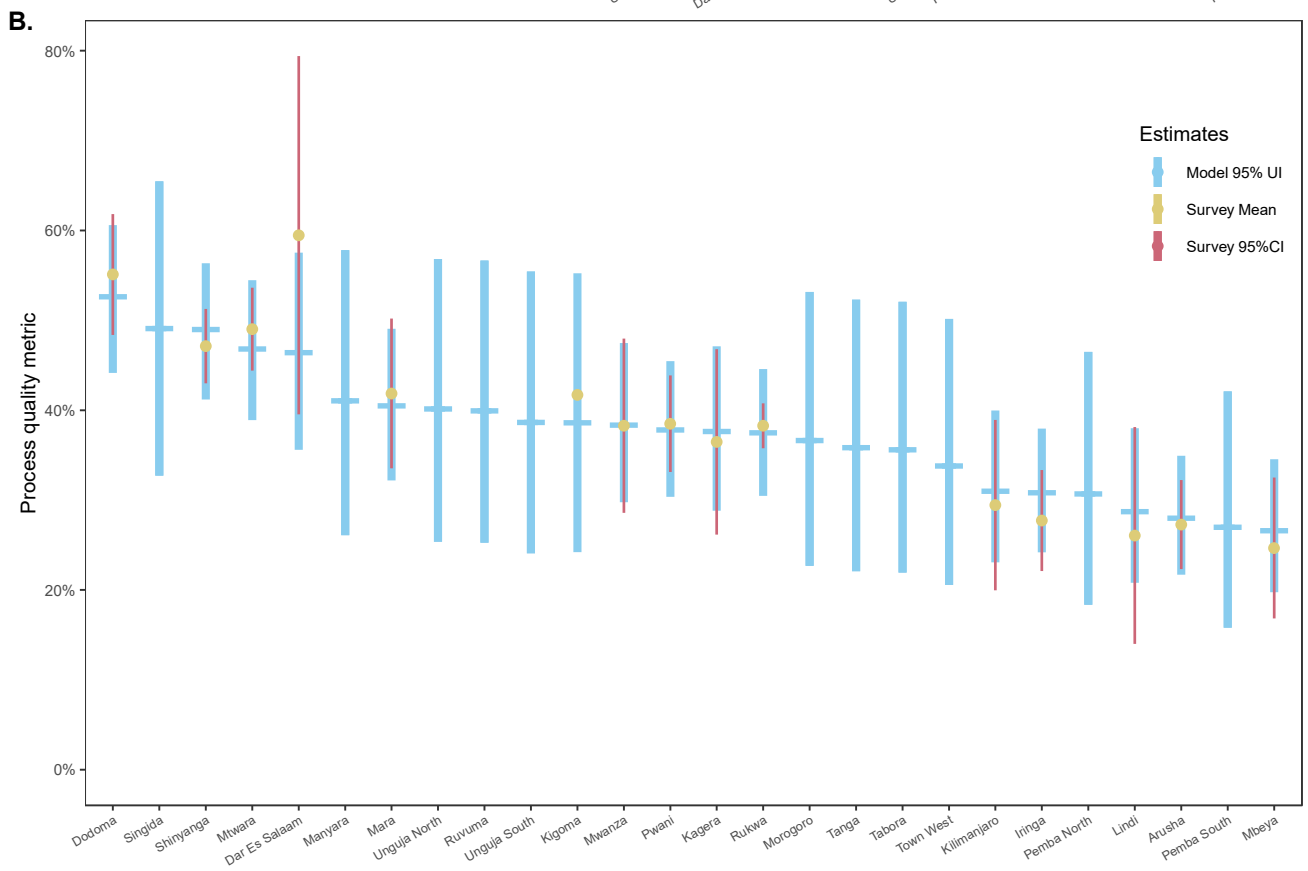

275  
276  
277

**Supplementary Figure S2: Comparison of region-level survey and model estimates for the readiness and process quality metrics in Tanzania, in 2016. This figure compares**

278 empirical survey and model estimates, for the most recent year when data was available in  
279 Tanzania. Thick light-blue dash and vertical ranges show model posterior mean estimates, and  
280 the 95% posterior prediction intervals. Yellow dots and narrow red vertical lines indicate survey  
281 estimates and 95% confidence intervals, derived from SDI 2016 (n = 386 facilities sampled,  
282 panel A; n = 543 providers assessed in 397 facilities, panel B).  
283

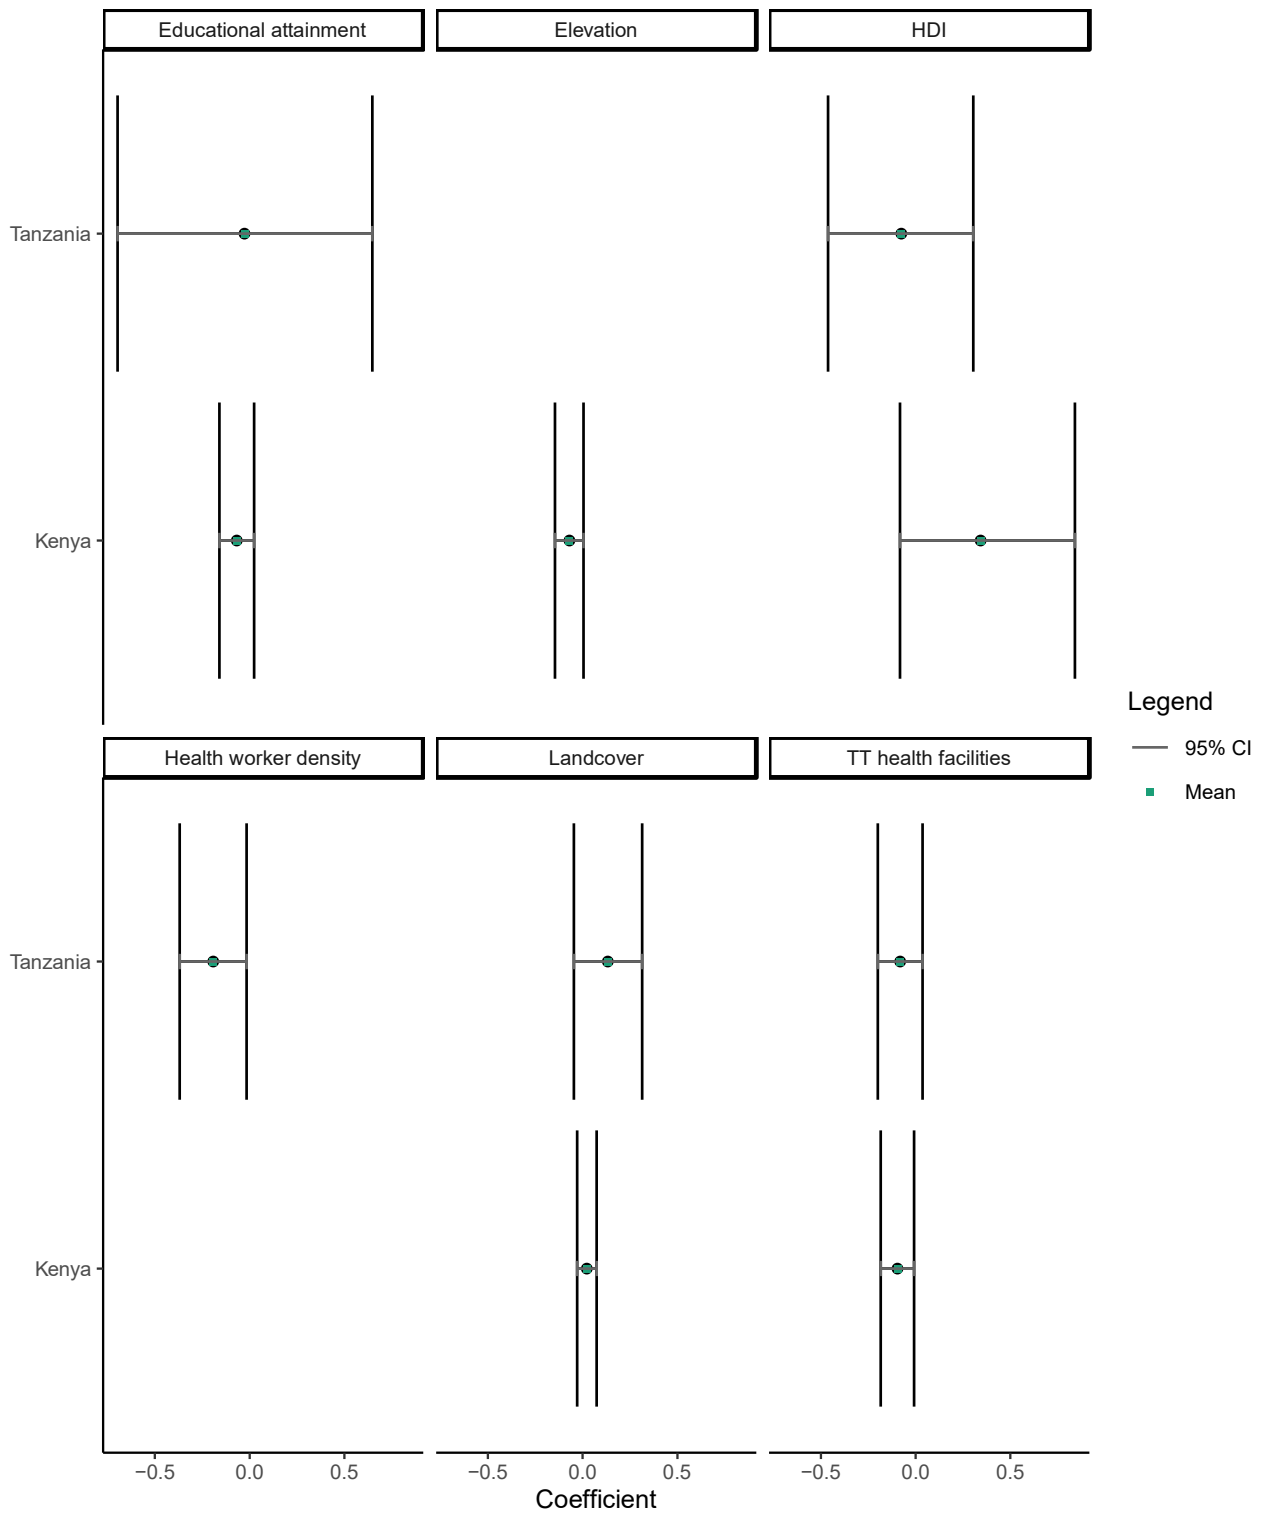

284  
285  
286  
287

**Supplementary Figure S3:** Regression coefficients from small area models that included covariates (n = 1,974, Kenya; n = 884, Tanzania). All the variables were scaled for computational purposes.

288 Access = average travel time to nearest urban settlements with over 50,000 inhabitants; HDI =  
 289 human development index; TT health facilities = travel time to nearest facility; Landcover =  
 290 measure of urbanicity of the area; Elevation = average elevation of the area.

291

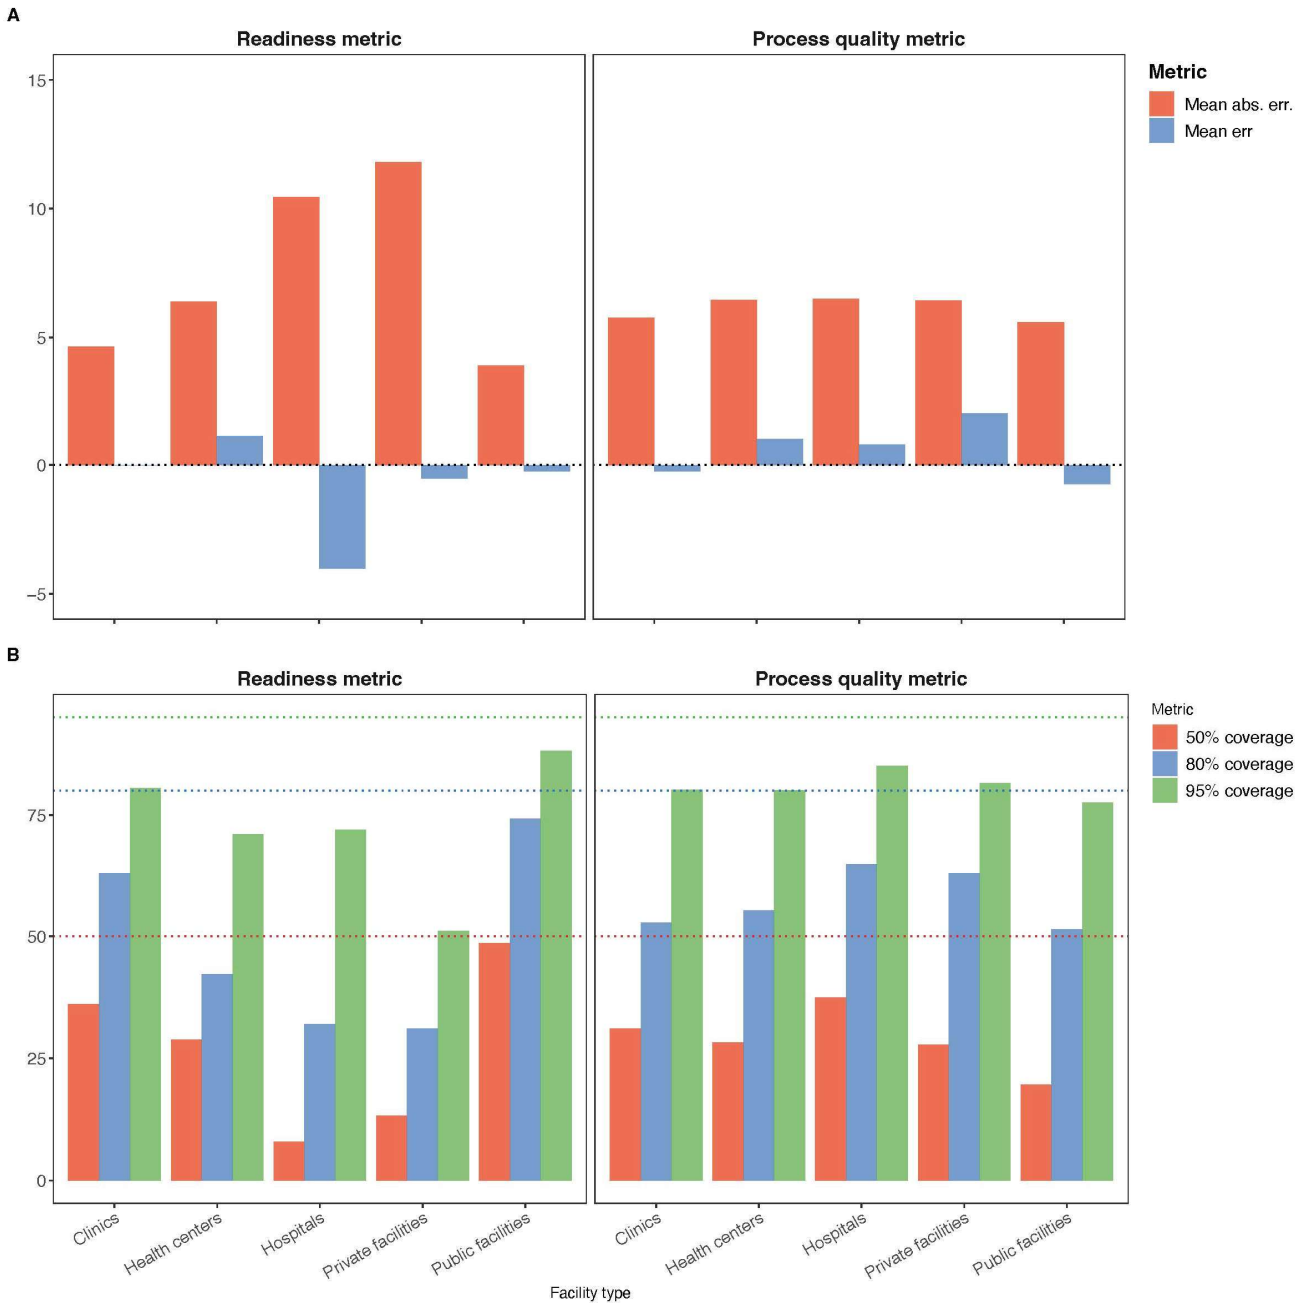

292  
 293  
 294  
 295  
 296  
 297

**Supplementary Figure S4: Measures of (Panel A) calibration, and (Panel B) bias and precision of models' predictions for stratified analysis, using hold-out predictions of readiness and process quality metrics in departments of Senegal.** Mean error, mean absolute error, and coverage were calculated across all administrative areas, using cross validation.

298 Stratified analyses only include one of five type of facilities- public facilities, private facilities, hospitals, health  
299 centers, and clinics.  
300

301 **Section 3.6 Examples of model outputs in Kenya and Tanzania**  
302  
303



Average Readiness (%)

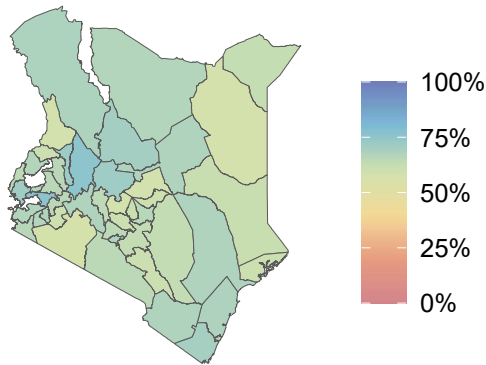

Readiness Uncertainty

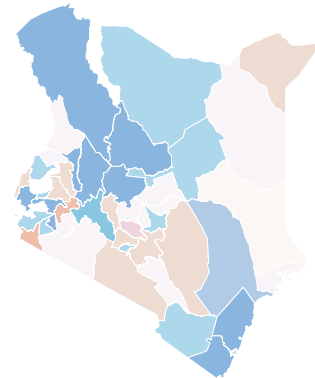

Average Process Quality (%)

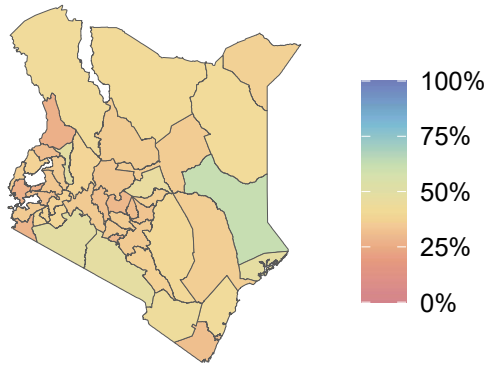

Process Quality Uncertainty

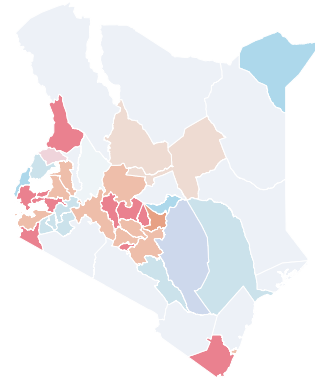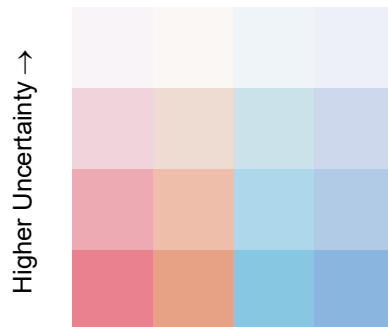

Higher average Readiness/Process quality →

304  
305

**Supplementary Figure S5: Maps of model-estimated readiness (panel A) and process quality (panel B) metrics by subnational areas in Kenya in 2020, with associated uncertainty.** The left panel presents estimates of the mean, while the right panel shows both estimates of the mean and their associated 95% uncertainty interval width. Mean estimated metrics are split into quartiles; the cut-off points indicate the metric estimates' minimum, 25<sup>th</sup>, 50<sup>th</sup>, and 75<sup>th</sup> percentiles, and maximum, which were 57.1%, 61.4%, 65.5%, 67.7%, and 75.8%, for the readiness metric, and 25.4%, 31.7%, 35.5%, 39.7%, and 61.9%, for process quality. The confidence intervals' width

313 minimum, 25<sup>th</sup>, 50<sup>th</sup>, and 75<sup>th</sup> percentiles, and maximum, were 21.0%, 24.6%, 25.4%, 26.4%,  
 314 and 27.3%.  
 315  
 316

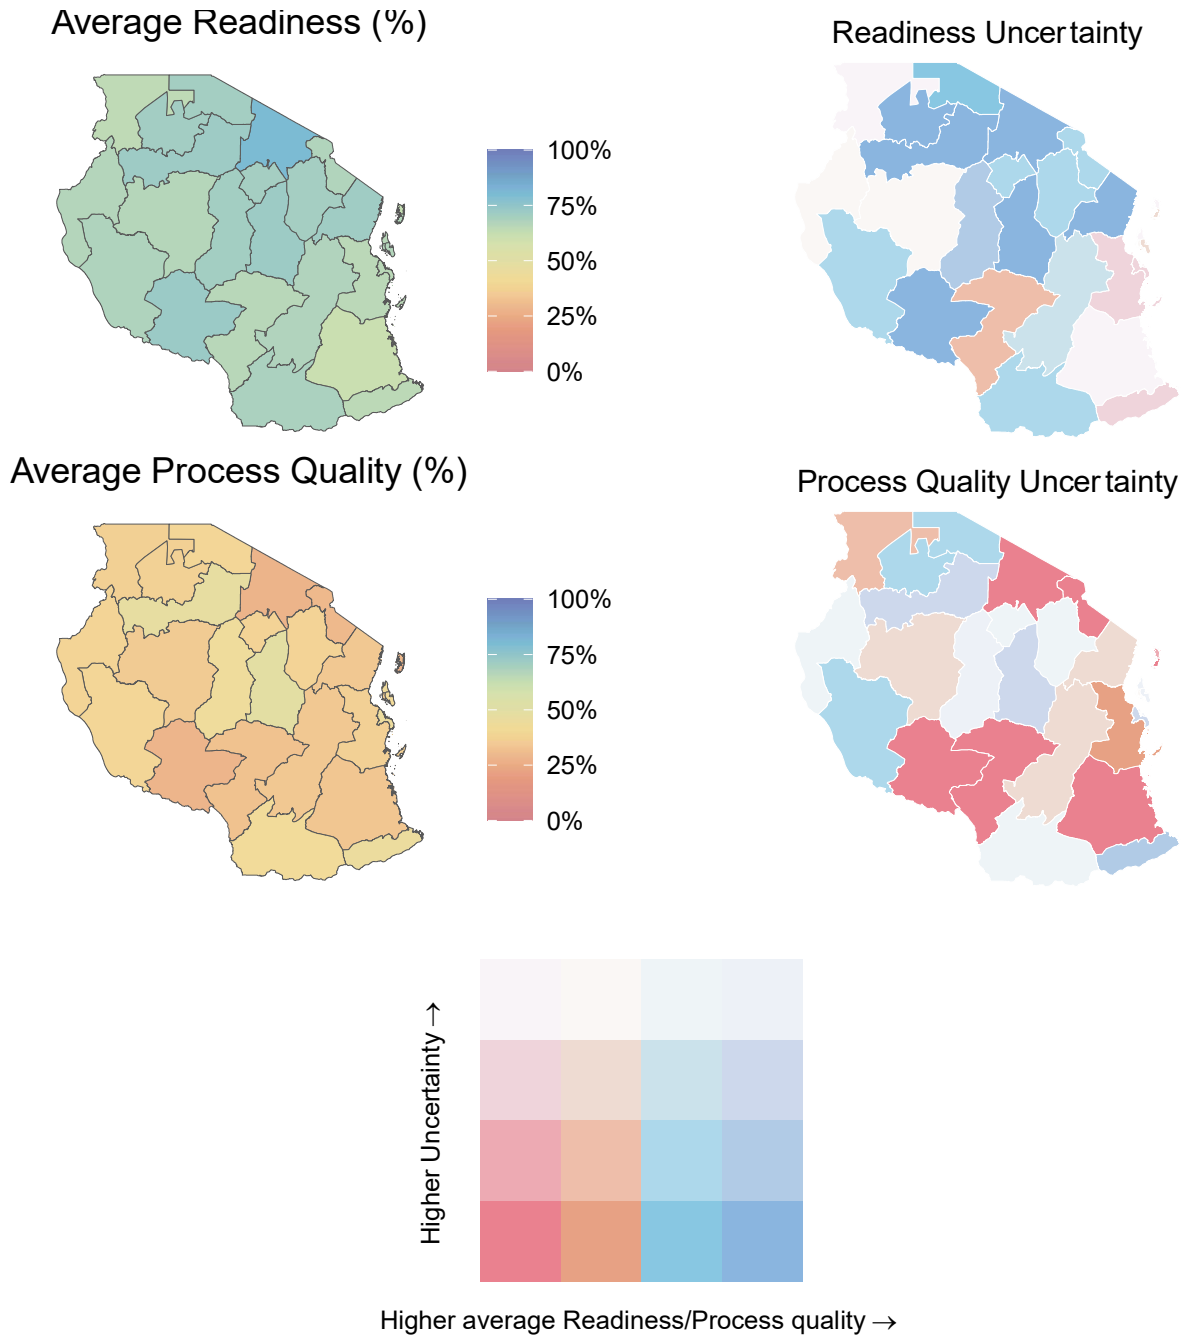

317  
 318 **Supplementary Figure S6: Maps of model-estimated readiness (panel A) and process**  
 319 **quality (panel B) metrics by subnational areas in Tanzania in 2020, with associated**  
 320 **uncertainty.** The left panel presents estimates of the mean, while the right panel shows both estimates  
 321 of the mean and their associated 95% uncertainty interval width. Mean estimated metrics are split into  
 322

323 quartiles; the cut-off points indicate the metric estimates' minimum, 25<sup>th</sup>, 50<sup>th</sup>, and 75<sup>th</sup> percentiles,  
324 and maximum, which were 61.3%, 65.4%, 66.9%, 70.4%, and 80.0%, for the readiness metric, and  
325 27.3%, 33.7%, 36.8%, 41.4%, and 49.5%, for process quality. The confidence intervals' width  
326 minimum, 25<sup>th</sup>, 50<sup>th</sup>, and 75<sup>th</sup> percentiles, and maximum, were 40.3%, 50.2%, 52.2%, 53.0%,  
327 and 55.0%.

**A.** Readiness Public Facilities (%)

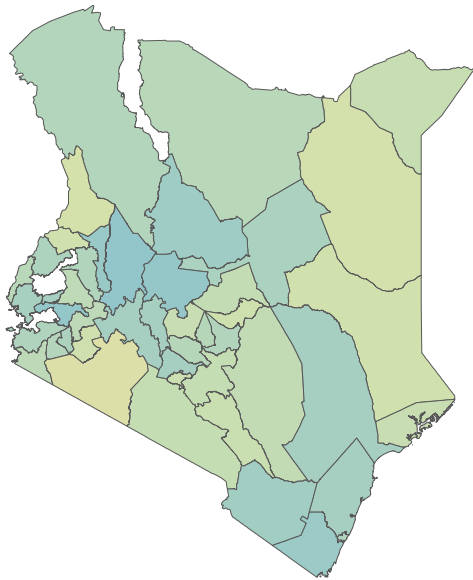

**B.** Readiness Private facilities (%)

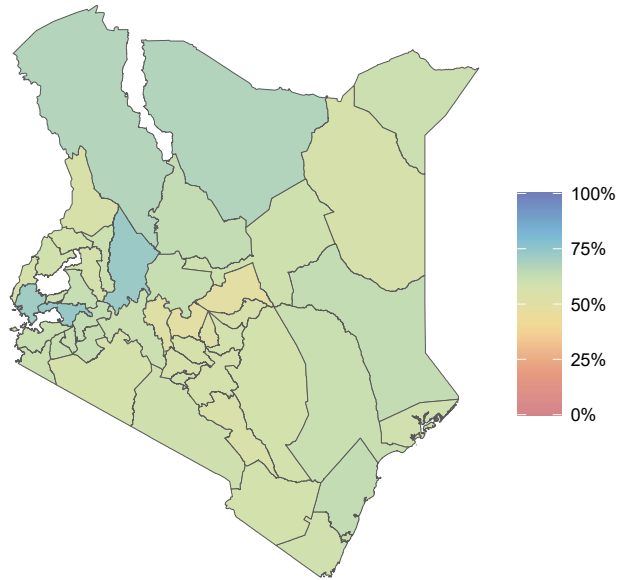

**C.** Process Quality Public facilities (%)

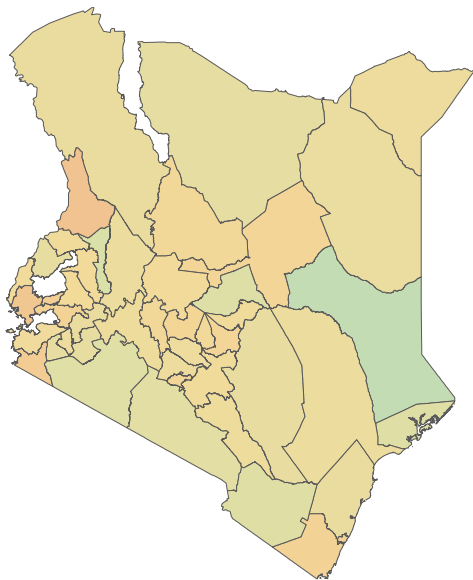

**D.** Process Quality Private facilities (%)

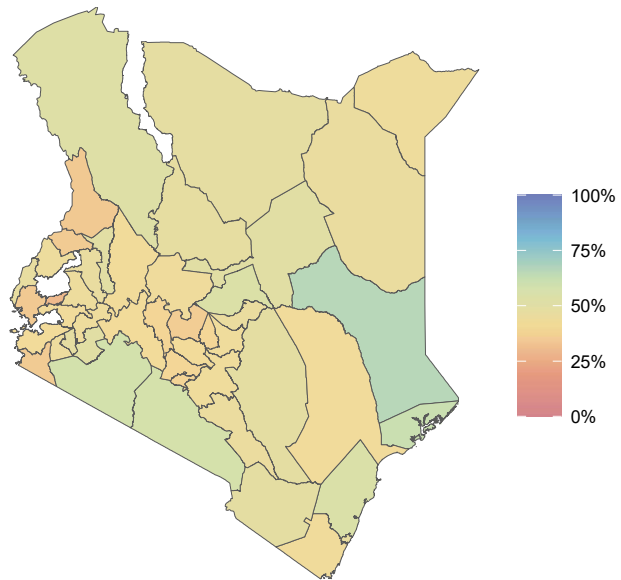

328

329

330 **Supplementary Figure S7: Maps of model-estimated readiness (top panel) and process**  
331 **quality (bottom panel) metrics by subnational areas, and managing authorities, in Kenya**

332 in 2020. Figures A and B (respectively C and D) are maps of modelled area-level estimates of  
333 readiness (respectively process quality) for analyses stratified on public and private facilities.  
334

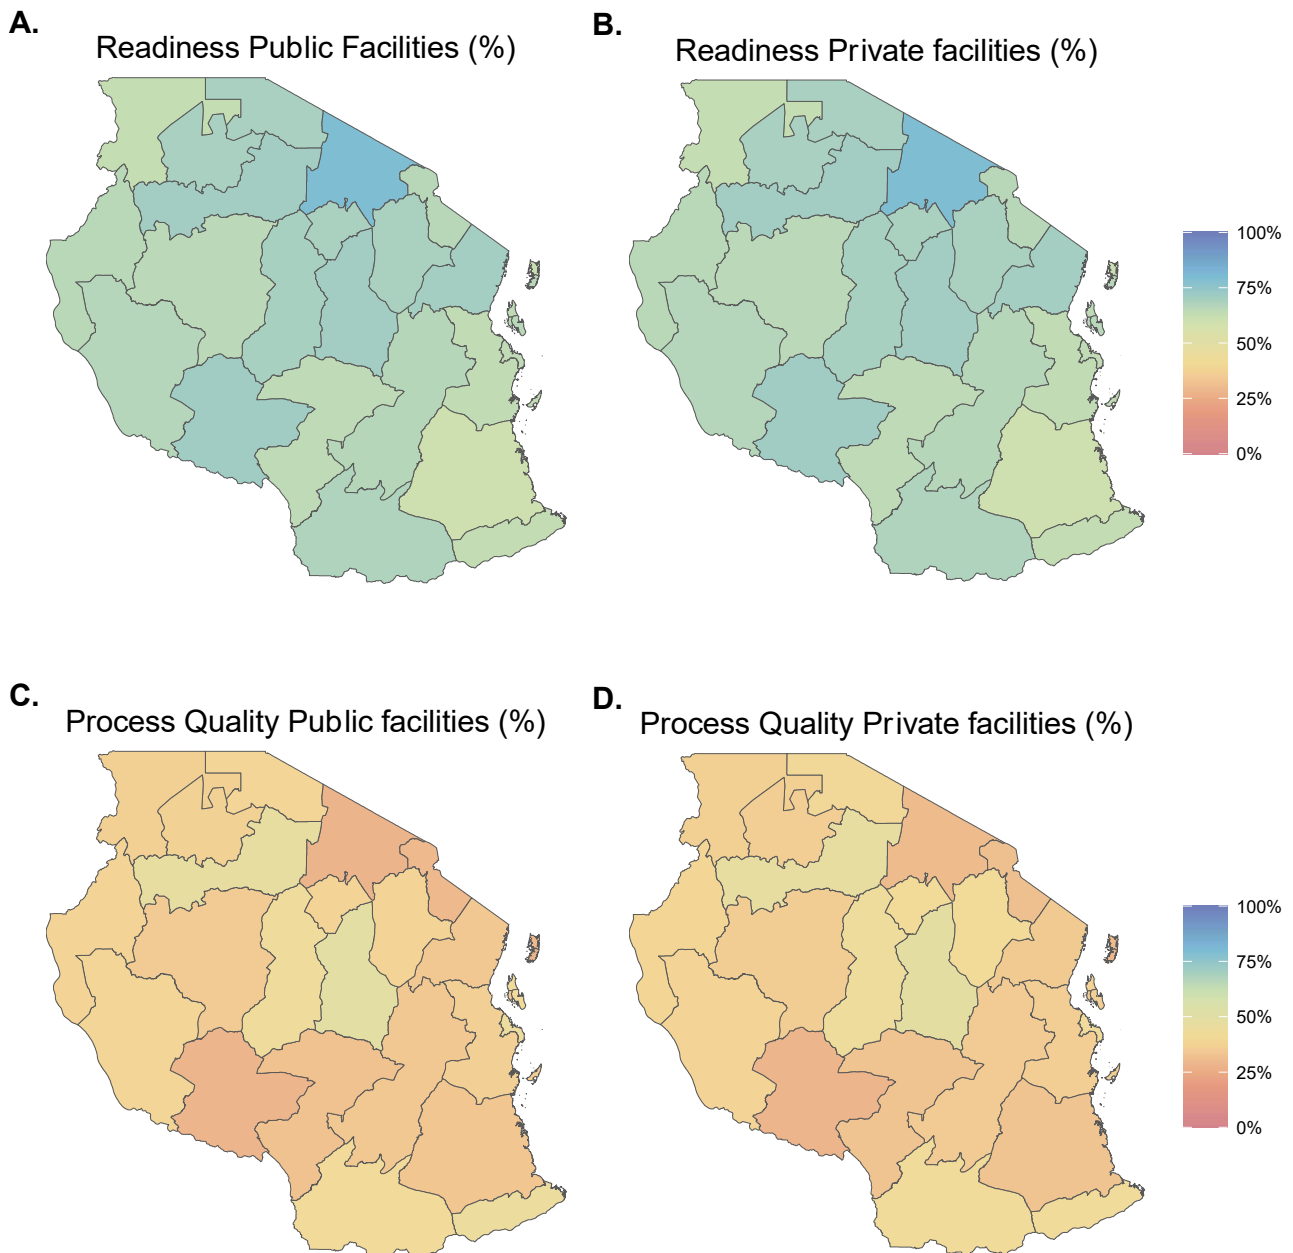

335  
336 **Supplementary Figure S8: Maps of model-estimated readiness (top panel) and process**  
337 **quality (bottom panel) metrics by subnational areas, and managing authorities, in**  
338 **Tanzania in 2020.** Figures A and B (respectively C and D) are maps of modelled area-level  
339 estimates of readiness (respectively process quality) for analyses stratified on public and private  
340 facilities.

341

342

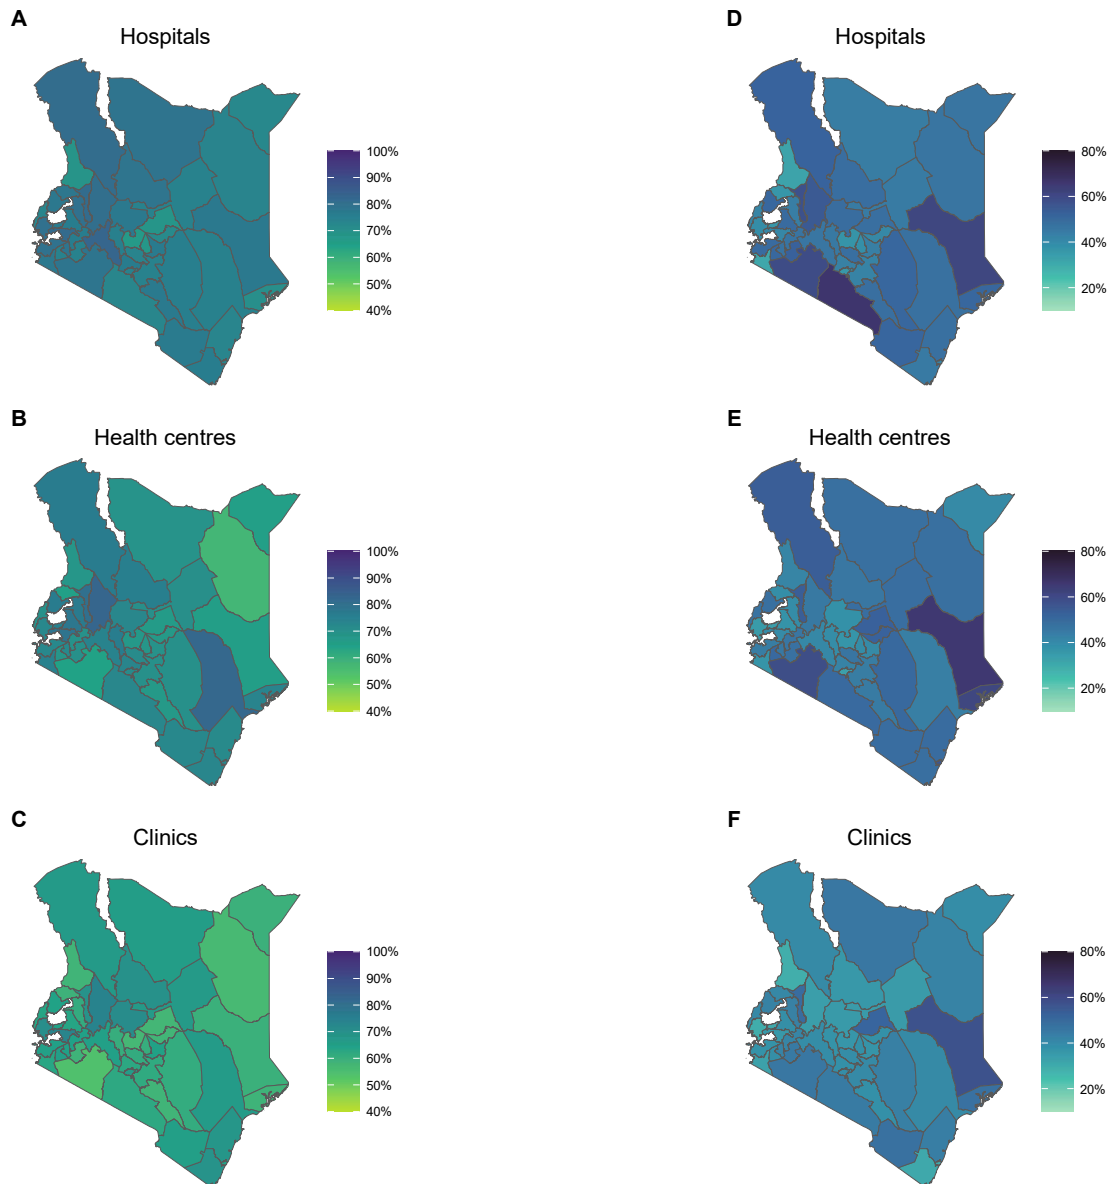

343

344

345

346

347

348

349

350

351

**Supplementary Figure S9: Maps of model-estimated readiness (left panel) and process quality (right panel) metrics by subnational areas, and managing authorities, in Kenya in 2020.** Figures A, B, and C (respectively D, E, and F) are maps of modelled area-level estimates of readiness (respectively process quality) for analyses stratified on facility type.

352 **Supplementary References**

353

- 354 1. Mercer, L. D. *et al.* Space-Time Smoothing of Complex Survey Data: Small Area Estimation for Child  
355 Mortality. *Ann. Appl. Stat.* **9**, 1889–1905 (2015).
- 356 2. Besag, J., York, J. & Mollié, A. Bayesian image restoration, with two applications in spatial statistics.  
357 *Ann. Inst. Stat. Math.* **43**, 1–20 (1991).
- 358 3. Simpson, D., Rue, H., Riebler, A., Martins, T. G. & Sørbye, S. H. Penalising Model Component  
359 Complexity: A Principled, Practical Approach to Constructing Priors. *Stat. Sci.* **32**, (2017).
- 360 4. Rue, H., Martino, S. & Chopin, N. Approximate Bayesian inference for latent Gaussian models by  
361 using integrated nested Laplace approximations. *J. R. Stat. Soc. Ser. B Stat. Methodol.* **71**, 319–392  
362 (2009).
- 363 5. Lindgren, F. & Rue, H. Bayesian Spatial Modelling with R-INLA. *J. Stat. Softw.* **63**, 1–25 (2015).
- 364 6. Faraway, J. J. On the Cost of Data Analysis. *J. Comput. Graph. Stat.* **1**, 213–229 (1992).
- 365 7. Spiegelhalter, D. J., Best, N. G., Carlin, B. P. & van der Linde, A. The deviance information criterion:  
366 12 years on. *J. R. Stat. Soc. Ser. B Stat. Methodol.* **76**, 485–493 (2014).
- 367 8. Watanabe, S. Asymptotic Equivalence of Bayes Cross Validation and Widely Applicable Information  
368 Criterion in Singular Learning Theory. 24.
- 369 9. Held, L., Schrödle, B. & Rue, H. Posterior and cross-validators predictive checks: A comparison of  
370 MCMC and INLA. *Stat. Model. Regres. Struct.* 91–110 (2010) doi:10.1007/978-3-7908-2413-1\_6.

371
